# Supplementary material for: Prediction and Analysis of Surface Hydrophobic Residues in Tertiary Structure of Proteins
Source: ScientificWorldJournal. 2014 Jan 9;2014:971258. doi: 10.1155/2014/971258 (PMC3930195; doi:10.1155/2014/971258)
Supplement: Supplementary file 1 — Supplementary file Containing 218 proteins dataset which provides detailed values of no of residues in each protein. No of residues occur on surface and buried & No of hydrophobic residues occur on surface and buried. [file 971258.f1.xlsx]

## Sheet: Sheet1
Pdbid	Total number of residues	Total number of	Total number of	Total number of	Total number	Total
		surface	Buried	Hydro-	of	Number
		residues	residues	Phobic	surface	of
				residues	hydro-	buried-
					phobic	hydro-
					residues	phobic
						residues
1A8S 273 170 103 100 46 54
1ALQ 259 166 93 89 33 56
1B1C 166 116 50 56 18 38
1B6A 355 233 122 114 50 64
1B8O 280 184 96 104 41 63
1B9D 143 111 32 54 29 25
1BS0 382 258 124 156 74 82
1BS1 224 155 69 88 45 43
1BXE 108 83 25 45 24 21
1C75 71 61 10 29 19 10
1CC4 391 259 132 145 63 82
1CC8 72 61 11 25 16 9
1CPQ 129 111 18 56 45 11
1CTJ 89 78 11 36 28 8
1CYO 88 78 10 24 16 8
1CZA 898 550 348 331 111 220
1DQY 283 177 106 87 35 52
1E5K 188 133 55 76 34 42
1EG2 270 192 78 98 53 45
1EJ2 167 124 43 63 34 29
1EX7 186 151 35 64 41 23
1EXR 146 131 15 54 42 12
1F4P 147 105 42 53 24 29
1F9P 81 72 9 26 18 8
1FCY 236 172 64 92 51 41
1FK5 93 82 11 31 27 4
1FKB 107 86 21 34 21 13
1FL2 310 225 85 123 68 55
1FT5 211 186 25 52 42 10
1G2B 62 51 11 20 11 9
1G3P 191 149 42 47 33 14
1G5A 628 385 243 227 78 149
1G6X 58 51 7 18 18 1
1G12 167 115 52 49 25 24
1GA8 271 186 85 97 46 51
1GCI 269 156 113 98 29 69
1GCY 415 249 166 123 42 81
1GMI 135 103 32 49 25 24
1GP6 349 243 106 123 67 56
1GWU 307 203 104 112 55 57
1GXY 446 312 134 140 67 73
1H2E 207 146 61 71 33 38
1H6H 143 122 21 57 41 16
1H98 77 67 10 22 16 6
1HD2 161 109 52 67 35 32
1HDH 1048 606 442 376 156 220
1HDO 205 142 63 79 41 38
1HG5 263 188 75 102 54 48
1HML 123 93 30 39 26 13
1HT6 404 243 161 146 57 89
1HXN 210 153 57 63 24 39
1I5G 144 96 48 56 23 33
1I5R 285 204 81 121 65 56
1I71 83 65 18 11 9 2
1IM5 179 122 57 65 27 38
1IMX 56 48 8 18 14 4
1IOW 306 216 90 127 68 59
1ISP 179 116 63 62 26 36
1J0P 108 102 6 27 26 1
1J2L 68 63 5 12 12 1
1J9M 257 165 92 92 36 56
1JBK 189 137 52 76 34 42
1JDC 418 254 164 123 42 81
1JEO 174 128 46 74 38 36
1JFB 399 281 118 157 78 79
1JFX 217 145 72 65 31 34
1JG1 215 148 67 83 38 45
1JHJ 161 121 40 44 22 22
1JIX 351 235 116 136 57 79
1JND 400 256 144 133 52 81
1K77 256 172 84 101 43 58
1KG2 224 167 57 84 43 41
1KGD 175 135 40 62 32 30
1KK1 397 273 124 148 67 81
1KMV 186 140 46 62 36 26
1KP6 79 67 12 20 18 2
1KQ3 364 234 130 147 67 80
1KQ6 136 116 20 44 30 14
1KSK 230 196 34 79 57 22
1KT6 175 139 36 58 35 23
1LC0 290 208 82 115 65 50
1LF7 164 132 32 69 46 23
1LRI 98 86 12 34 27 7
1LTZ 274 189 85 110 62 48
1LV7 251 179 72 110 55 55
1LYV 283 187 96 98 39 59
1LZK 313 206 107 127 63 64
1M15 356 235 121 117 44 73
1M1Q 90 90 1 22 22 1
1M2K 249 184 65 95 50 45
1M33 251 158 93 100 40 60
1M40 263 168 95 97 40 57
1MC2 122 96 26 26 18 8
1MDO 355 258 97 145 84 61
1MFM 153 103 50 46 17 29
1MJ5 298 173 125 115 46 69
1MJN 179 124 55 69 29 40
1ML4 307 198 109 119 45 74
1MLW 290 192 98 97 44 53
1MUW 386 271 115 149 81 68
1MVL 173 122 51 71 33 38
1MW9 556 404 152 200 94 106
1MX3 326 236 90 133 63 70
1N6A 228 177 51 69 44 25
1N70 334 218 116 127 65 62
1NHS 446 320 126 175 85 90
1NMY 209 150 59 80 41 39
1NNF 308 208 100 116 52 64
1NQZ 171 122 49 71 37 34
1NUY 328 209 119 127 58 69
1NWZ 125 95 30 44 24 20
1O4R 105 85 20 31 20 11
1O6V 925 632 293 337 84 253
1OBO 338 221 117 108 39 69
1OC7 364 230 134 130 57 73
1ODM 329 233 96 109 58 51
1OEW 328 221 107 109 50 59
1OH4 174 121 53 58 21 37
1OMR 201 147 54 63 27 36
1OPK 449 333 116 146 74 72
1PA7 130 101 29 53 33 20
1PB7 281 196 85 93 36 57
1PKH 357 278 79 126 71 55
1PLC 99 80 19 37 24 13
1PMH 181 124 57 59 22 37
1PWA 123 96 27 45 29 16
1Q44 284 191 93 98 40 58
1Q92 195 146 49 71 39 32
1QCS 190 150 40 69 37 32
1QDD 144 111 33 39 23 16
1QHQ 139 99 40 57 30 27
1QJ8 148 116 32 39 30 9
1QKR 343 276 67 119 73 46
1QQQ 259 190 69 89 49 40
1QV1 187 134 53 59 32 27
1R67 151 114 37 55 30 25
1R6J 82 70 12 31 19 12
1R6X 386 261 125 138 59 79
1RJU 36 31 5 1 1 1
1RTQ 291 168 123 96 31 65
1RTT 174 121 53 74 33 41
1S2W 258 186 72 104 52 52
1S2Z 190 151 39 71 49 22
1S8N 190 133 57 86 39 47
1SEN 135 94 41 44 17 27
1SGW 200 138 62 77 32 45
1SVB 395 299 96 130 72 58
1SVS 316 225 91 118 58 60
1SX7 164 132 32 61 35 26
1SZN 417 274 143 142 67 75
1T1G 357 218 139 134 60 74
1TBF 326 229 97 131 71 60
1THG 543 310 233 193 63 130
1TKJ 277 170 107 94 41 53
1TVZ 386 243 143 148 62 86
1TZW 142 101 41 53 22 31
1UAS 362 221 141 112 42 70
1UCD 190 134 56 58 29 29
1UG6 426 245 181 163 67 96
1UJ6 221 150 71 94 46 48
1UJP 243 159 84 114 43 71
1UOW 157 109 48 57 27 30
1US0 314 198 116 112 47 65
1VB0 61 56 5 6 6 1
1VH2 152 116 36 56 32 24
1VJF 162 123 39 68 42 26
1VYR 363 220 143 133 52 81
1W3U 360 232 128 136 63 73
1W4X 533 349 184 187 80 107
1XL0 810 476 334 307 116 191
1Y0P 568 381 187 205 102 103
1YQS 345 209 136 124 47 77
1YW9 369 247 122 116 53 63
1ZSQ 513 321 192 176 75 101
2A0N 251 170 81 107 46 61
2A7B 120 91 29 44 23 21
2C78 397 258 139 148 56 92
2CBP 96 74 22 31 18 13
2CVC 500 482 18 153 144 9
2CY3 118 117 1 31 30 1
2CYY 147 132 15 54 40 14
2DSX 52 45 7 13 12 1
2EBN 285 183 102 101 34 67
2FDN 55 50 5 20 16 4
2FVY 305 201 104 121 49 72
2FXU 360 244 116 130 66 64
2G5R 114 86 28 32 17 15
2GDM 153 122 31 69 44 25
2GUY 476 281 195 150 45 105
2H5C 198 133 65 69 38 31
2H7M 268 191 77 116 65 51
2HBG 147 118 29 68 46 22
2HTS 88 74 14 27 16 11
2IYV 179 136 43 72 42 30
2MCM 112 87 25 41 23 18
2MHR 118 88 30 39 23 16
2NLR 222 146 76 69 30 39
2NVH 152 112 40 51 30 21
2OLR 535 323 212 187 70 117
2PVB 107 79 28 50 28 22
2SRC 449 336 113 145 75 70
2YAS 256 153 103 94 33 61
3CAO 102 100 2 26 25 1
4DCG 291 203 88 112 56 56
5TMP 210 153 57 83 51 32
7FD1 106 80 26 35 19 16
8ABP 305 195 110 116 51 65
